# Supplementary material for: Safety of FOLFIRI + Durvalumab +/− Tremelimumab in Second Line of Patients with Advanced Gastric Cancer: A Safety Run-In from the Randomized Phase II Study DURIGAST PRODIGE 59
Source: MDPI journal article supplement (doi:10.3390/biomedicines10051211), 2022-05-23
Supplement: s1 [file s1]

Supplementary Data S2. Treatment-not related adverse events.

| n, %                                                   | Arm A<br>(Folfiri + Durvalumab) (n = 8) |                  | Arm B<br>(Folfiri + Durvalumab +<br>Tremelimumab) (n = 3) |                  |
|--------------------------------------------------------|-----------------------------------------|------------------|-----------------------------------------------------------|------------------|
|                                                        | Grade<br>1–2                            | Grade<br>3–4–5   | Grade<br>1–2                                              | Grade<br>3–4–5   |
| <b>Patients exhibiting at least one adverse event</b>  | <b>7 (87.5%)</b>                        | <b>4 (50.0%)</b> | <b>2 (66.7%)</b>                                          | <b>1 (33.3%)</b> |
| <b>Ear and labyrinth disorder</b>                      | <b>1 (12.5%)</b>                        | -                | <b>1 (33.3%)</b>                                          | -                |
| Vertigo                                                | 1 (12.5%)                               | -                | 1 (33.3%)                                                 | -                |
| <b>Skin and subcutaneous tissue disorders</b>          | <b>1 (12.5%)</b>                        | -                | -                                                         | -                |
| Dry skin                                               | 1 (12.5%)                               | -                | -                                                         | -                |
| <b>Nervous system disorders</b>                        | <b>4 (50.0%)</b>                        | <b>1 (12.5%)</b> |                                                           | <b>1 (33.3%)</b> |
| Peripheral sensory neuropathy                          | 4 (50.0%)                               | 1 (12.5%)        | -                                                         | -                |
| Syncope                                                | -                                       | -                | -                                                         | 1 (33.3%)        |
| <b>Gastrointestinal disorders</b>                      | <b>2 (25.0%)</b>                        | <b>2 (25.0%)</b> | <b>3 (100.0%)</b>                                         |                  |
| Constipation                                           | -                                       | -                | 1 (33.3%)                                                 | -                |
| Abdominal pain                                         | 1 (12.5%)                               | -                | 2 (66.6%)                                                 | -                |
| Dysphagia                                              | -                                       | 2 (25.0%)        | -                                                         | -                |
| Dyspepsia                                              | 1 (12.5%)                               | -                | -                                                         | -                |
| Vomiting                                               | -                                       | 1 (12.5%)        | -                                                         |                  |
| <b>Musculoskeletal conditions</b>                      | <b>1 (12.5%)</b>                        | -                | <b>1 (33.3%)</b>                                          | -                |
| Back pain                                              | 1 (12.5%)                               | -                | -                                                         | -                |
| Generalized muscle weakness                            | -                                       | -                | 1 (33.3%)                                                 | -                |
| <b>Respiratory, thoracic and mediastinal disorders</b> | <b>3 (37.5%)</b>                        | <b>2 (25%)</b>   | <b>1 (33.3%)</b>                                          | -                |
| Dyspnoea                                               | 1 (12.5%)                               | 1 (12.5%)        | -                                                         | -                |
| Cough                                                  | 2 (25.0%)                               | -                | 1 (33.3%)                                                 | -                |
| Aspiration                                             | -                                       | 1 (12.5%)        | -                                                         | -                |
| <b>Infections and infestations</b>                     | <b>3 (37.5%)</b>                        | <b>2 (25.0%)</b> | <b>1 (33.3%)</b>                                          | <b>1 (33.3%)</b> |
| Abdominal infection                                    | -                                       | -                | -                                                         | 1 (33.3%)        |
| Urinary tract infection                                | 1 (12.5%)                               | 1 (12.5%)        | -                                                         | -                |
| Lung infection                                         | -                                       | 1 (12.5%)        | -                                                         | -                |
| Prostate infection                                     | 1 (12.5%)                               | -                | -                                                         | -                |
| Tooth infection                                        | 1 (12.5%)                               | -                | 1 (33.3%)                                                 | -                |
| <b>Blood and lymphatic system disorders</b>            | <b>1 (12.5%)</b>                        | -                | -                                                         | -                |
| Lymphopenia                                            | 1 (12.5%)                               | -                | -                                                         | -                |
| <b>Investigations</b>                                  | <b>2 (25.0%)</b>                        | <b>1 (12.5%)</b> | -                                                         | -                |
| Gamma-glutamyltransferase increased                    | 1 (12.5%)                               | 1 (12.5%)        | -                                                         | -                |
| Alkaline phosphatase increased                         | 1 (12.5%)                               |                  |                                                           |                  |
| <b>Metabolism and nutrition disorders</b>              | <b>1 (12.5%)</b>                        | -                | <b>1 (33.3%)</b>                                          | -                |
| Anorexia                                               | -                                       | -                | 1 (33.3%)                                                 | -                |
| Hyperglycaemia                                         | 1 (12.5%)                               | -                | -                                                         | -                |
| <b>General disorder</b>                                | <b>1 (12.5%)</b>                        | -                | -                                                         | <b>1 (33.3%)</b> |
| Fatigue                                                | -                                       | -                | -                                                         | 1 (33.3%)        |
| Fever                                                  | 1 (12.5%)                               | -                | -                                                         | -                |

The total of adverse events could be superior to the total number of patients since some patients could have more than one adverse event.
